# Supplementary material
Source: PubMed Central journal article supplement (PMC4253021)

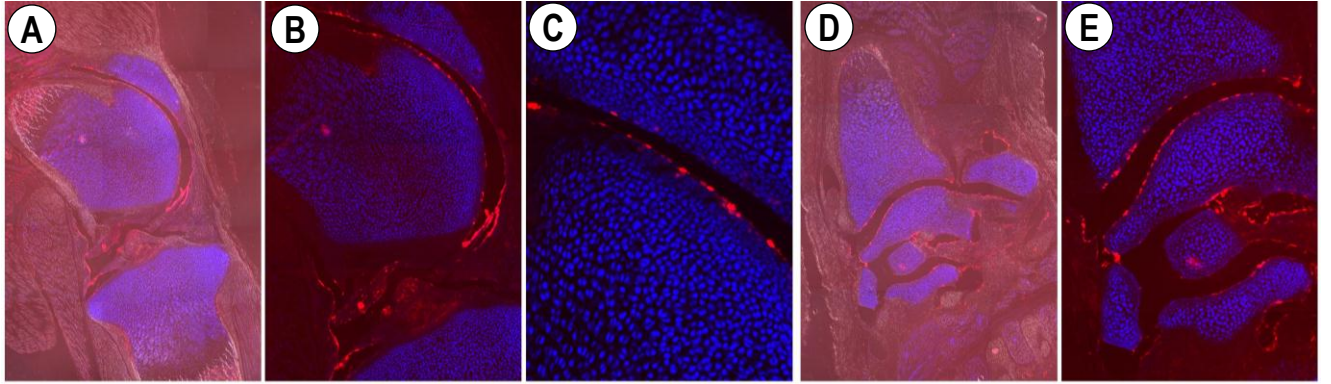

*Supplemental Figure 3*

Supplement: NIHMS629080-supplement-4.pdf [file NIHMS629080-supplement-4.pdf]
